# Supplementary material
Source: Springer Nature journal article supplement (https://www.springermedizin.de/resource/supplementary/12936_2007_441_MOESM2_ESM.pdf/9547454)

**Parsimonious**

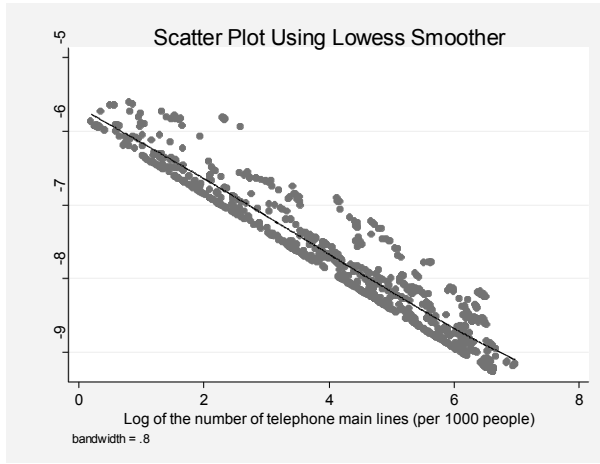

**A. Telephone**

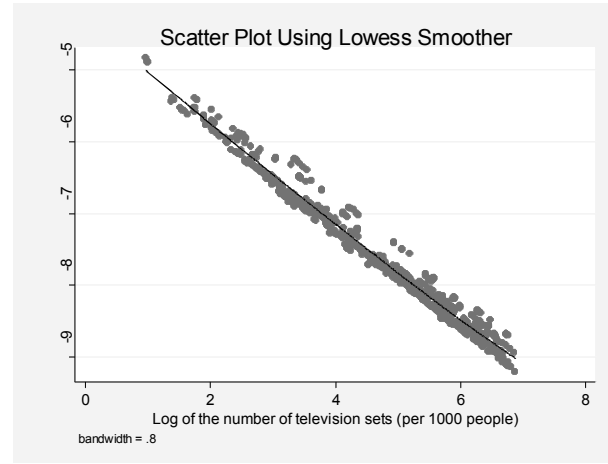

**B. TV**

**Extended**

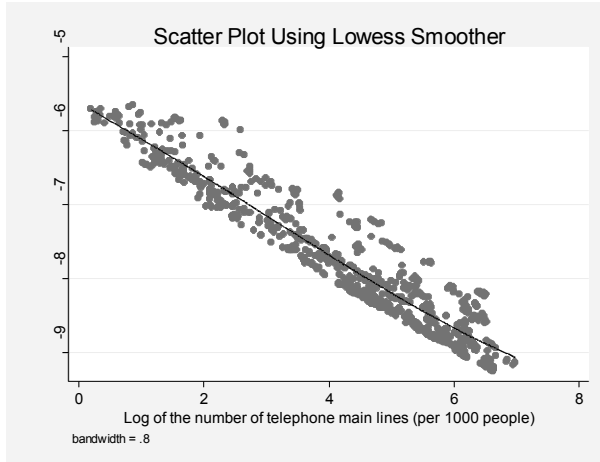

**C. Telephone**

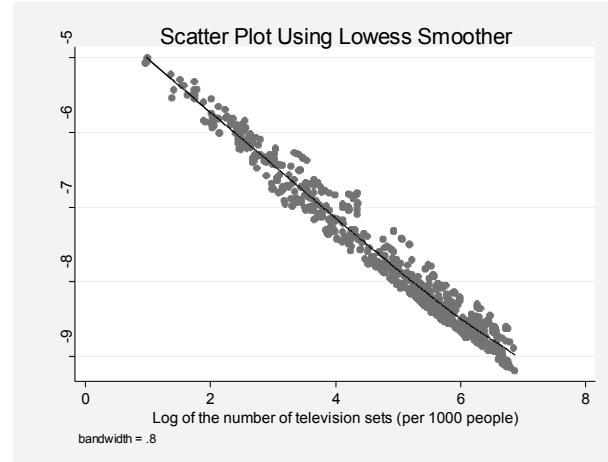

**D. TV**

Supplement: MOESM2 [file 9547454]
